# Supplementary material
Source: PubMed Central journal article supplement (PMC3174855)
Supplement: supp_jn.111.140178_nut_140178_SF1.pdf [file supp_jn.111.140178_nut_140178_SF1.pdf]

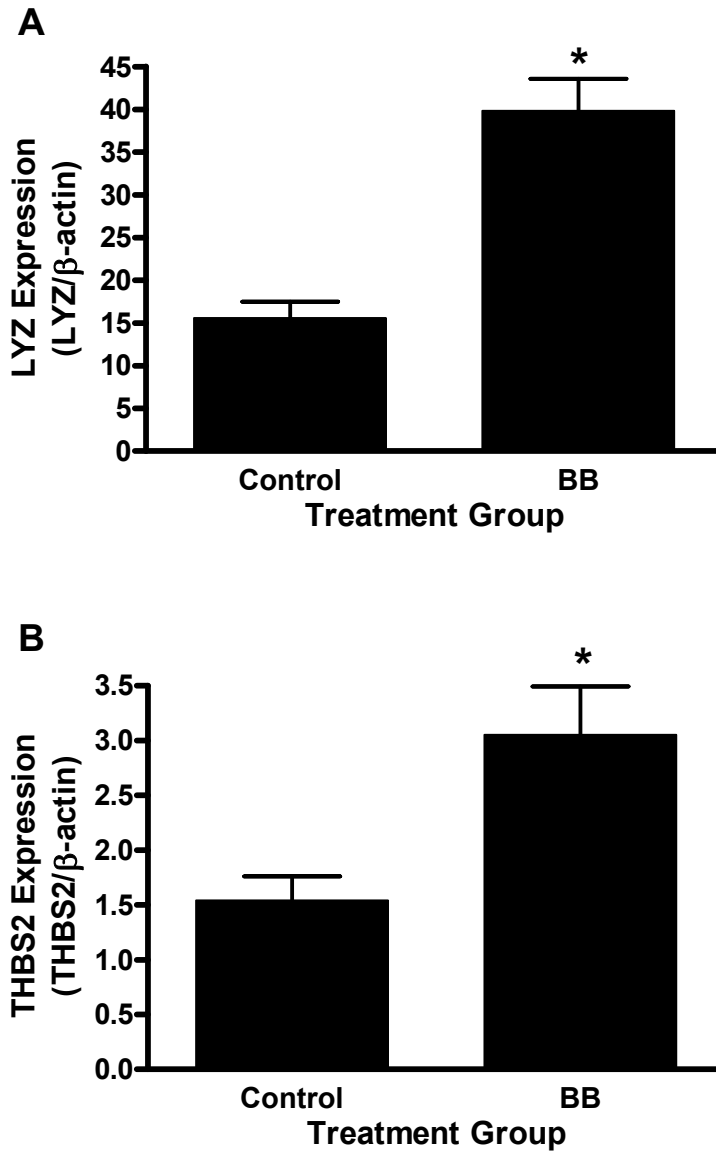

Supplemental Figure 1. Relative mRNA expression levels of LYZ (A) and THBS2 (B) in tumor samples from female, nude mice fed control or 5% blueberry (BB) diet. Data are mean  $\pm$  SE (n = 3). \*Different from control ( $p \leq 0.05$ ).
