# Supplementary material
Source: PubMed Central journal article supplement (PMC3174855)
Supplement: supp_jn.111.140178_nut_140178_ST1.pdf [file supp_jn.111.140178_nut_140178_ST1.pdf]

## Online Supporting Material

Supplemental Table 1. Nutrient composition, phenolic content and ORAC value of freeze-dried blueberry powder

| Nutritional Information (per 100 g) <sup>1</sup> |       |
|--------------------------------------------------|-------|
| Calories, kcal                                   | 347.0 |
| Protein, g                                       | 3.5   |
| Carbohydrate, g                                  | 84.7  |
| Fat, g                                           | 0.0   |
| Total sugar, g                                   | 59.0  |
| Fiber, g                                         | 19.0  |
| Vitamin A, $\mu\text{mol/L}$                     | 0.0   |
| Vitamin C, mg                                    | 172.0 |
| Calcium, mg                                      | 30.0  |
| Iron, mg                                         | 1.0   |
| Potassium, mg                                    | 408.0 |
| Sodium, mg                                       | 16.0  |
| Phenolics, mg/g                                  | 32.5  |
| Anthocyanins, mg/g                               | 14.8  |
| ORAC, $\mu\text{mole TE/g}$                      | 356.0 |

<sup>1</sup>Analysis provided by the U.S. Highbush Blueberry Council
