# Supplementary material
Source: PubMed Central journal article supplement (PMC3174855)
Supplement: supp_jn.111.140178_nut_140178_ST2.pdf [file supp_jn.111.140178_nut_140178_ST2.pdf]

Online Supporting Material

**Supplemental Table 2. Top Biological Functions Regulated by 5% BB Ingestion in MDA-MB-231 Tumors From Female, Nude Mice Compared to Control-fed Mice**

| <b>Diseases and Disorders</b>                          |                         |                         | <b>P-value</b>                                    |                         |                         | <b>Genes, n</b> |  |  |
|--------------------------------------------------------|-------------------------|-------------------------|---------------------------------------------------|-------------------------|-------------------------|-----------------|--|--|
| Inflammatory Response                                  |                         |                         | 3.10 x 10 <sup>-6</sup> - 2.63 x 10 <sup>-2</sup> |                         |                         | 58              |  |  |
| Inflammatory Disease                                   |                         |                         | 6.77 x 10 <sup>-6</sup> - 2.63 x 10 <sup>-2</sup> |                         |                         | 69              |  |  |
| Ophthalmic Disease                                     |                         |                         | 2.42 x 10 <sup>-5</sup> - 2.15 x 10 <sup>-2</sup> |                         |                         | 24              |  |  |
| Respiratory Disease                                    |                         |                         | 2.65 x 10 <sup>-5</sup> - 1.73 x 10 <sup>-2</sup> |                         |                         | 32              |  |  |
| Cardiovascular Disease                                 |                         |                         | 3.01 x 10 <sup>-5</sup> - 2.19 x 10 <sup>-2</sup> |                         |                         | 27              |  |  |
| <b>Molecular and Cellular Functions</b>                |                         |                         | <b>P-value</b>                                    |                         |                         | <b>Genes, n</b> |  |  |
| Gene Expression                                        |                         |                         | 7.03 x 10 <sup>-5</sup> - 2.63 x 10 <sup>-2</sup> |                         |                         | 11              |  |  |
| Cell-To-Cell Signaling & Interaction                   |                         |                         | 8.78 x 10 <sup>-5</sup> - 2.63 x 10 <sup>-2</sup> |                         |                         | 69              |  |  |
| Cellular Development                                   |                         |                         | 9.33 x 10 <sup>-5</sup> - 2.46 x 10 <sup>-2</sup> |                         |                         | 51              |  |  |
| Cell Cycle                                             |                         |                         | 1.72 x 10 <sup>-4</sup> - 1.73 x 10 <sup>-2</sup> |                         |                         | 8               |  |  |
| Cellular Movement                                      |                         |                         | 2.17 x 10 <sup>-4</sup> - 2.58 x 10 <sup>-2</sup> |                         |                         | 66              |  |  |
| <b>Physiological System Development &amp; Function</b> |                         |                         | <b>P-value</b>                                    |                         |                         | <b>Genes, n</b> |  |  |
| Hematological System Development & Function            |                         |                         | 8.78 x 10 <sup>-5</sup> - 2.53 x 10 <sup>-2</sup> |                         |                         | 67              |  |  |
| Immune Cell Trafficking                                |                         |                         | 8.78 x 10 <sup>-5</sup> - 2.53 x 10 <sup>-2</sup> |                         |                         | 48              |  |  |
| Hematopoiesis                                          |                         |                         | 9.33 x 10 <sup>-5</sup> - 2.46 x 10 <sup>-2</sup> |                         |                         | 37              |  |  |
| Humoral Immune Response                                |                         |                         | 9.33 x 10 <sup>-5</sup> - 2.30 x 10 <sup>-2</sup> |                         |                         | 23              |  |  |
| Cardiovascular System Development & Function           |                         |                         | 3.38 x 10 <sup>-4</sup> - 2.63 x 10 <sup>-2</sup> |                         |                         | 21              |  |  |
| <b>Log (2) Ratio Upregulated Genes</b>                 |                         |                         | <b>Log (2) Ratio Downregulated Genes</b>          |                         |                         |                 |  |  |
| <b>Name</b>                                            | <b>Expression Value</b> | <b>P-value</b>          | <b>Name</b>                                       | <b>Expression Value</b> | <b>P-value</b>          |                 |  |  |
| THBS2                                                  | 3.736                   | 8.95 x 10 <sup>-2</sup> | HMCN1                                             | -1.388                  | 1.76 x 10 <sup>-2</sup> |                 |  |  |
| LYZ                                                    | 2.104                   | 5.26 x 10 <sup>-3</sup> | HYDIN                                             | -1.285                  | 1.80 x 10 <sup>-2</sup> |                 |  |  |
| ATP6VOD2                                               | 1.948                   | 5.13 x 10 <sup>-3</sup> | SLC4A8                                            | -1.262                  | 1.35 x 10 <sup>-2</sup> |                 |  |  |
| SFRP4                                                  | 1.794                   | 7.47 x 10 <sup>-3</sup> | XCL1                                              | -1.209                  | 3.21 x 10 <sup>-3</sup> |                 |  |  |
| HLA-DQA2                                               | 1.660                   | 5.12 x 10 <sup>-2</sup> | CP                                                | -1.181                  | 1.78 x 10 <sup>-3</sup> |                 |  |  |
| VAV3                                                   | 1.393                   | 1.42 x 10 <sup>-2</sup> | NPIP                                              | -1.177                  | 6.70 x 10 <sup>-3</sup> |                 |  |  |
| SEPP1                                                  | 1.369                   | 9.76 x 10 <sup>-3</sup> | INSL4                                             | -1.126                  | 2.73 x 10 <sup>-3</sup> |                 |  |  |
| NCKAP1L                                                | 1.352                   | 4.26 x 10 <sup>-3</sup> | LTB4R                                             | -1.118                  | 3.87 x 10 <sup>-4</sup> |                 |  |  |
